# Supplementary material for: Phytosterols Inhibit Side-Chain Oxysterol Mediated Activation of LXR in Breast Cancer Cells
Source: PubMed Central journal article supplement (PMC6651815; doi:10.3390/ijms20133241), 2019-07-02
Supplement: ijms-20-03241-s001.pdf [file ijms-20-03241-s001.pdf]

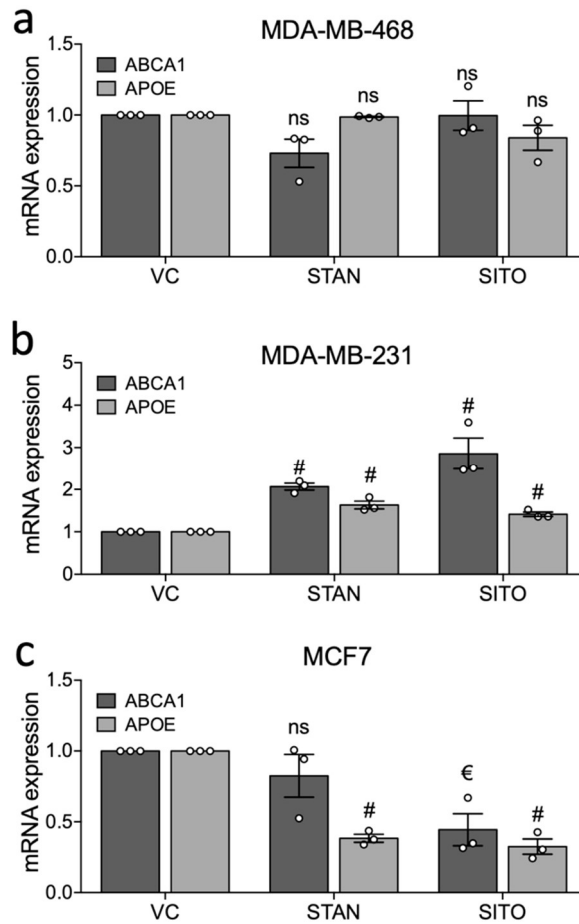

**Supplementary Figure S1:** Gene expression analysis. Hormone receptor negative (a) MDA-MB-468 and (b) MDA-MB-231 cells, and hormone receptor positive (c) MCF7 cells were treated with PSS (10  $\mu$ M) for 16 hr and expression of ABCA1 and APOE was assessed by TaqMan assays ( $\Delta\Delta$ cT using HPRT and normalised to vehicle). Data shown are mean of three independent replicates with SEM. One-way ANOVA with Holm-Sidak correction for multiple testing was used to determine statistical significance  $\epsilon$ = $p$ <0.05 and #= $p$ <0.0001).

Supplementary Table S1: Inhibition of oxysterol induced LXR activity by PSSs and cell line.

|                 | 1uM         |             |             |              |             | 10 uM       |             |             |              |             |
|-----------------|-------------|-------------|-------------|--------------|-------------|-------------|-------------|-------------|--------------|-------------|
|                 | <u>Stan</u> | <u>Sito</u> | <u>Camp</u> | <u>Brass</u> | <u>Stig</u> | <u>Stan</u> | <u>Sito</u> | <u>Camp</u> | <u>Brass</u> | <u>Stig</u> |
| 468             |             |             |             |              |             |             |             |             |              |             |
| 24-OHC          | 67.59%      | 64.93%      | 63.85%      | 61.93%       | 68.20%      | 74.04%      | 72.56%      | 51.40%      | 39.82%       | 45.41%      |
| 24,25-EC        | 83.42%      | 80.14%      | 74.29%      | 84.09%       | 78.69%      | 56.85%      | 70.42%      | 17.59%      | 40.60%       | 47.43%      |
| 25-OHC          | 56.73%      | 50.39%      | 61.11%      | 60.47%       | 50.44%      | 39.26%      | 30.38%      | 32.50%      | 43.05%       | 31.59%      |
| 26-OHC          | 54.00%      | 49.00%      | 49.27%      | 61.55%       | 57.49%      | 73.08%      | 67.44%      | 50.14%      | 31.99%       | 0.00%       |
| Mean inhibition | 65.44%      | 61.11%      | 62.13%      | 67.01%       | 63.71%      | 60.81%      | 60.20%      | 37.91%      | 38.86%       | 31.11%      |
|                 | 1uM         |             |             |              |             | 10 uM       |             |             |              |             |
|                 | <u>Stan</u> | <u>Sito</u> | <u>Camp</u> | <u>Brass</u> | <u>Stig</u> | <u>Stan</u> | <u>Sito</u> | <u>Camp</u> | <u>Brass</u> | <u>Stig</u> |
| 231             |             |             |             |              |             |             |             |             |              |             |
| 24-OHC          | 23.68%      | 41.44%      | 48.73%      | 30.77%       | 34.12%      | 72.17%      | 61.52%      | 61.62%      | 60.71%       | 57.33%      |
| 24,25-EC        | 35.10%      | 31.19%      | 33.41%      | 32.09%       | 32.03%      | 83.88%      | 78.41%      | 34.76%      | 0.00%        | 32.31%      |
| 25-OHC          | 48.41%      | 39.34%      | 47.17%      | 40.24%       | 41.19%      | 46.44%      | 57.80%      | 36.15%      | 19.17%       | 26.50%      |
| 26-OHC          | 25.52%      | 0.00%       | 0.00%       | 0.00%        | 0.00%       | 59.31%      | 54.39%      | 68.70%      | 41.07%       | 35.99%      |
| Mean inhibition | 33.18%      | 27.99%      | 32.33%      | 25.78%       | 26.83%      | 65.45%      | 63.03%      | 50.31%      | 30.24%       | 38.03%      |
|                 | 1uM         |             |             |              |             | 10 uM       |             |             |              |             |
|                 | <u>Stan</u> | <u>Sito</u> | <u>Camp</u> | <u>Brass</u> | <u>Stig</u> | <u>Stan</u> | <u>Sito</u> | <u>Camp</u> | <u>Brass</u> | <u>Stig</u> |
| MCF7            |             |             |             |              |             |             |             |             |              |             |
| 24-OHC          | 29.62%      | 0.00%       | 42.42%      | 33.75%       | 33.58%      | 47.34%      | 39.92%      | 38.36%      | 32.37%       | 28.87%      |
| 24,25-EC        | 0.00%       | 30.47%      | 28.67%      | 28.63%       | 29.60%      | 32.11%      | 32.99%      | 23.28%      | 25.85%       | 22.50%      |
| 25-OHC          | 40.17%      | 29.74%      | 34.26%      | 52.39%       | 49.46%      | 41.87%      | 43.65%      | 36.63%      | 20.47%       | 0.00%       |
| 26-OHC          | 28.83%      | 0.00%       | 26.71%      | 34.81%       | 48.61%      | 48.19%      | 46.39%      | 37.41%      | 17.34%       | 0.00%       |
| Mean inhibition | 24.65%      | 15.05%      | 33.01%      | 37.39%       | 40.31%      | 42.38%      | 40.74%      | 33.92%      | 24.01%       | 12.84%      |
